# Supplementary material for: Intact Fibrillated 3D-Printed Cellulose Macrofibrils/CaCO3 for Controlled Drug Delivery
Source: MDPI journal article supplement (doi:10.3390/polym13121912), 2021-06-08
Supplement: s1 [file s1]

# Supplementary Materials: Intact Fibrillated 3D-Printed Cellulose Macrofibrils/CaCO<sub>3</sub> for Controlled Drug Delivery

Denesh Mohan, Zee Khai Teong, Mohd Shaiful Sajab, Nur Hidayatul Nazirah Kamarudin and Hatika Kaco

**Table S1.** Volumetric flow rate,  $Q_v$  vs Extrusion Speed of CMF solution. The data are presented as mean  $\pm$  standard deviation ( $n = 3$ ).

| Extrusion Speed (mm/s) | Volumetric Flow Rate, $Q_v$ (mm <sup>3</sup> /s) |
|------------------------|--------------------------------------------------|
| 0.4174 $\pm$ 0.0125    | 7.2501 $\pm$ 0.2042                              |
| 0.5146 $\pm$ 0.0134    | 8.5823 $\pm$ 0.3251                              |
| 0.6091 $\pm$ 0.0113    | 9.5833 $\pm$ 0.2750                              |
| 0.6862 $\pm$ 0.0206    | 11.1667 $\pm$ 0.3583                             |
| 0.7855 $\pm$ 0.0186    | 13.0033 $\pm$ 0.4267                             |

**Table S2.** Volumetric flow rate,  $Q_v$  vs Extrusion Speed of CMF solution. The data are presented as mean  $\pm$  standard deviation ( $n = 3$ ).

| Print Speed, $v$ (mm/s) | Print Line Width, $x$ (mm) | Print Line Height, $h$ (mm) | Print Cross-sectional Area, $A$ (mm <sup>2</sup> ) |
|-------------------------|----------------------------|-----------------------------|----------------------------------------------------|
| 5                       | 1.68 $\pm$ 0.07            | 1.39 $\pm$ 0.06             | 1.84 $\pm$ 0.12                                    |
| 10                      | 1.24 $\pm$ 0.09            | 0.95 $\pm$ 0.03             | 0.93 $\pm$ 0.15                                    |
| 15                      | 0.92 $\pm$ 0.06            | 0.86 $\pm$ 0.04             | 0.62 $\pm$ 0.13                                    |
| 20                      | 0.80 $\pm$ 0.05            | 0.78 $\pm$ 0.06             | 0.49 $\pm$ 0.12                                    |
| 25                      | 0.71 $\pm$ 0.07            | 0.68 $\pm$ 0.04             | 0.37 $\pm$ 0.13                                    |
| 30                      | 0.65 $\pm$ 0.09            | 0.63 $\pm$ 0.06             | 0.32 $\pm$ 0.14                                    |

**Table S3.** Mechanical Properties of 3D printed CMF. The data are presented as mean  $\pm$  standard deviation ( $n = 3$ ).

| Samples | Tensile Strength (MPa) | Young's Modulus (GPa) | Strain (%)      |
|---------|------------------------|-----------------------|-----------------|
| CMF 7%  | 48.96 $\pm$ 1.02       | 1.59 $\pm$ 0.06       | 7.54 $\pm$ 0.12 |
| CMF 8%  | 58.89 $\pm$ 1.36       | 1.91 $\pm$ 0.07       | 8.05 $\pm$ 0.08 |
| CMF 9%  | 66.70 $\pm$ 0.98       | 2.16 $\pm$ 0.06       | 8.76 $\pm$ 0.09 |

**Table S4.** 5-FU uptake data on CMF/CaCO<sub>3</sub> composite printed structure. The data are presented as mean  $\pm$  standard deviation ( $n = 3$ ).

| Samples                   | $C_0$ (ppm) | $C_e$ (ppm) | LE (%)           | $q_e$ (mg/g)    |
|---------------------------|-------------|-------------|------------------|-----------------|
| CMF                       | 8           | 6.19        | 22.67 $\pm$ 0.53 | 0.91 $\pm$ 0.03 |
| CMF:0.25CaCO <sub>3</sub> |             | 5.73        | 28.36 $\pm$ 0.41 | 1.13 $\pm$ 0.05 |
| CMF:0.50CaCO <sub>3</sub> |             | 5.35        | 33.17 $\pm$ 0.62 | 1.33 $\pm$ 0.05 |
| CMF:0.75CaCO <sub>3</sub> |             | 4.87        | 39.13 $\pm$ 0.56 | 1.57 $\pm$ 0.06 |
| CMF:1.00CaCO <sub>3</sub> |             | 4.45        | 44.41 $\pm$ 0.47 | 1.78 $\pm$ 0.04 |
| CaCO <sub>3</sub>         |             | 1.40        | 82.49 $\pm$ 0.51 | 3.29 $\pm$ 0.07 |

$C_0$  and  $C_e$ , initial and equilibrium concentrations of the 5-FU (mg/L); LE, loading efficiency of 5-FU at final equilibrium;  $q_e$ , total uptake amount of 5-FU at final equilibrium.

**Table S5.** One way ANOVA results on kinetic release of 5-FU (%) for 24 h (Tukey Method; N: 3;  $\alpha = 0.05$ ; Equal variances were assumed for the analysis)

| Samples                   | Time (h) | Mean   | StDev | Grouping |   |
|---------------------------|----------|--------|-------|----------|---|
| CaCO <sub>3</sub>         | 1        | 29.493 | 0.300 | A        |   |
| CMF:1.00CaCO <sub>3</sub> |          | 11.132 | 0.195 | B        |   |
| CMF:0.75CaCO <sub>3</sub> |          | 9.687  | 0.230 | C        |   |
| CMF:0.50CaCO <sub>3</sub> |          | 8.857  | 0.241 | D        |   |
| CMF:0.25CaCO <sub>3</sub> |          | 7.345  | 0.115 | E        |   |
| CMF                       |          | 7.286  | 0.100 | E        |   |
| CaCO <sub>3</sub>         | 2        | 48.941 | 0.201 | A        |   |
| CMF:1.00CaCO <sub>3</sub> |          | 14.468 | 0.331 | B        |   |
| CMF:0.75CaCO <sub>3</sub> |          | 12.454 | 0.250 | C        |   |
| CMF:0.50CaCO <sub>3</sub> |          | 11.187 | 0.248 | D        |   |
| CMF:0.25CaCO <sub>3</sub> |          | 10.185 | 0.209 | E        |   |
| CMF                       |          | 9.314  | 0.187 |          | F |
| CaCO <sub>3</sub>         | 3        | 59.610 | 0.262 | A        |   |
| CMF:1.00CaCO <sub>3</sub> |          | 18.157 | 0.431 | B        |   |
| CMF:0.75CaCO <sub>3</sub> |          | 16.289 | 0.326 | C        |   |
| CMF:0.50CaCO <sub>3</sub> |          | 14.257 | 0.348 | D        |   |
| CMF:0.25CaCO <sub>3</sub> |          | 13.331 | 0.300 | E        |   |
| CMF                       |          | 12.398 | 0.180 |          | F |
| CaCO <sub>3</sub>         | 4        | 67.096 | 0.202 | A        |   |
| CMF:1.00CaCO <sub>3</sub> |          | 22.081 | 0.431 | B        |   |
| CMF:0.75CaCO <sub>3</sub> |          | 19.083 | 0.382 | C        |   |
| CMF:0.50CaCO <sub>3</sub> |          | 17.456 | 0.379 | D        |   |
| CMF:0.25CaCO <sub>3</sub> |          | 16.055 | 0.322 | E        |   |
| CMF                       |          | 15.191 | 0.220 | E        |   |
| CaCO <sub>3</sub>         | 5        | 75.943 | 0.221 | A        |   |
| CMF:1.00CaCO <sub>3</sub> |          | 24.931 | 0.489 | B        |   |
| CMF:0.75CaCO <sub>3</sub> |          | 22.685 | 0.287 | C        |   |
| CMF:0.50CaCO <sub>3</sub> |          | 21.022 | 0.384 | D        |   |
| CMF:0.25CaCO <sub>3</sub> |          | 19.648 | 0.274 | E        |   |
| CMF                       |          | 19.015 | 0.276 | E        |   |
| CaCO <sub>3</sub>         | 6        | 82.122 | 0.295 | A        |   |
| CMF:1.00CaCO <sub>3</sub> |          | 30.764 | 0.188 | B        |   |
| CMF:0.75CaCO <sub>3</sub> |          | 26.213 | 0.382 | C        |   |
| CMF:0.50CaCO <sub>3</sub> |          | 22.888 | 0.430 | D        |   |
| CMF:0.25CaCO <sub>3</sub> |          | 21.109 | 0.295 | E        |   |
| CMF                       |          | 19.929 | 0.289 |          | F |
| CaCO <sub>3</sub>         | 7        | 85.992 | 0.280 | A        |   |
| CMF:1.00CaCO <sub>3</sub> |          | 34.391 | 0.214 | B        |   |
| CMF:0.75CaCO <sub>3</sub> |          | 30.491 | 0.140 | C        |   |
| CMF:0.50CaCO <sub>3</sub> |          | 24.269 | 0.283 | D        |   |
| CMF:0.25CaCO <sub>3</sub> |          | 22.570 | 0.315 | E        |   |
| CMF                       |          | 20.386 | 0.296 |          | F |

|                           |         |       |   |   |
|---------------------------|---------|-------|---|---|
| CaCO <sub>3</sub>         | 87.579  | 0.340 | A |   |
| CMF:1.00CaCO <sub>3</sub> | 38.623  | 0.245 | B |   |
| CMF:0.75CaCO <sub>3</sub> | 33.598  | 0.154 | C |   |
| CMF:0.50CaCO <sub>3</sub> | 27.465  | 0.333 | D |   |
| CMF:0.25CaCO <sub>3</sub> | 24.793  | 0.278 | E |   |
| CMF                       | 21.152  | 0.256 |   | F |
| CaCO <sub>3</sub>         | 88.556  | 0.350 | A |   |
| CMF:1.00CaCO <sub>3</sub> | 40.995  | 0.262 | B |   |
| CMF:0.75CaCO <sub>3</sub> | 36.758  | 0.169 | C |   |
| CMF:0.50CaCO <sub>3</sub> | 30.592  | 0.262 | D |   |
| CMF:0.25CaCO <sub>3</sub> | 27.200  | 0.305 | E |   |
| CMF                       | 22.214  | 0.322 |   | F |
| CaCO <sub>3</sub>         | 88.742  | 0.430 | A |   |
| CMF:1.00CaCO <sub>3</sub> | 44.717  | 0.290 | B |   |
| CMF:0.75CaCO <sub>3</sub> | 39.339  | 0.268 | C |   |
| CMF:0.50CaCO <sub>3</sub> | 32.404  | 0.282 | D |   |
| CMF:0.25CaCO <sub>3</sub> | 28.366  | 0.318 | E |   |
| CMF                       | 22.763  | 0.330 |   | F |
| CaCO <sub>3</sub>         | 88.887  | 0.315 | A |   |
| CMF:1.00CaCO <sub>3</sub> | 47.461  | 0.311 | B |   |
| CMF:0.75CaCO <sub>3</sub> | 40.916  | 0.279 | C |   |
| CMF:0.50CaCO <sub>3</sub> | 34.905  | 0.310 | D |   |
| CMF:0.25CaCO <sub>3</sub> | 30.554  | 0.343 | E |   |
| CMF                       | 23.677  | 0.343 |   | F |
| CaCO <sub>3</sub>         | 88.926  | 0.258 | A |   |
| CMF:1.00CaCO <sub>3</sub> | 49.709  | 0.445 | B |   |
| CMF:0.75CaCO <sub>3</sub> | 45.184  | 0.207 | C |   |
| CMF:0.50CaCO <sub>3</sub> | 37.468  | 0.340 | D |   |
| CMF:0.25CaCO <sub>3</sub> | 32.085  | 0.360 | E |   |
| CMF                       | 24.285  | 0.275 |   | F |
| CaCO <sub>3</sub>         | 88.9741 | 0.118 | A |   |
| CMF:1.00CaCO <sub>3</sub> | 52.438  | 0.349 | B |   |
| CMF:0.75CaCO <sub>3</sub> | 47.385  | 0.357 | C |   |
| CMF:0.50CaCO <sub>3</sub> | 40.481  | 0.289 | D |   |
| CMF:0.25CaCO <sub>3</sub> | 32.989  | 0.299 | E |   |
| CMF                       | 25.437  | 0.283 |   | F |
| CaCO <sub>3</sub>         | 89.0158 | 0.135 | A |   |
| CMF:1.00CaCO <sub>3</sub> | 55.974  | 0.377 | B |   |
| CMF:0.75CaCO <sub>3</sub> | 50.007  | 0.202 | C |   |
| CMF:0.50CaCO <sub>3</sub> | 42.354  | 0.306 | D |   |
| CMF:0.25CaCO <sub>3</sub> | 34.883  | 0.316 | E |   |
| CMF                       | 25.811  | 0.275 |   | F |

|                           |        |       |   |   |
|---------------------------|--------|-------|---|---|
| CaCO <sub>3</sub>         | 89.062 | 0.167 | A |   |
| CMF:1.00CaCO <sub>3</sub> | 58.166 | 0.386 | B |   |
| CMF:0.75CaCO <sub>3</sub> | 52.186 | 0.325 | C |   |
| CMF:0.50CaCO <sub>3</sub> | 45.413 | 0.335 | D |   |
| CMF:0.25CaCO <sub>3</sub> | 36.048 | 0.327 | E |   |
| CMF                       | 26.084 | 0.278 |   | F |
| CaCO <sub>3</sub>         | 89.092 | 0.240 | A |   |
| CMF:1.00CaCO <sub>3</sub> | 60.068 | 0.409 | B |   |
| CMF:0.75CaCO <sub>3</sub> | 54.754 | 0.221 | C |   |
| CMF:0.50CaCO <sub>3</sub> | 48.534 | 0.257 | D |   |
| CMF:0.25CaCO <sub>3</sub> | 37.213 | 0.337 | E |   |
| CMF                       | 26.358 | 0.281 |   | F |
| CaCO <sub>3</sub>         | 89.112 | 0.230 | A |   |
| CMF:1.00CaCO <sub>3</sub> | 63.324 | 0.435 | B |   |
| CMF:0.75CaCO <sub>3</sub> | 56.846 | 0.256 | C |   |
| CMF:0.50CaCO <sub>3</sub> | 51.089 | 0.274 | D |   |
| CMF:0.25CaCO <sub>3</sub> | 39.325 | 0.356 | E |   |
| CMF                       | 26.905 | 0.287 |   | F |
| CaCO <sub>3</sub>         | 89.131 | 0.205 | A |   |
| CMF:1.00CaCO <sub>3</sub> | 67.112 | 0.332 | B |   |
| CMF:0.75CaCO <sub>3</sub> | 58.427 | 0.263 | C |   |
| CMF:0.50CaCO <sub>3</sub> | 52.897 | 0.286 | D |   |
| CMF:0.25CaCO <sub>3</sub> | 41.409 | 0.332 | E |   |
| CMF                       | 27.270 | 0.291 |   | F |
| CaCO <sub>3</sub>         | 89.132 | 0.212 | A |   |
| CMF:1.00CaCO <sub>3</sub> | 70.210 | 0.490 | B |   |
| CMF:0.75CaCO <sub>3</sub> | 61.064 | 0.275 | C |   |
| CMF:0.50CaCO <sub>3</sub> | 54.705 | 0.298 | D |   |
| CMF:0.25CaCO <sub>3</sub> | 43.112 | 0.391 | E |   |
| CMF                       | 27.562 | 0.271 |   | F |
| CaCO <sub>3</sub>         | 89.159 | 0.226 | A |   |
| CMF:1.00CaCO <sub>3</sub> | 72.676 | 0.510 | B |   |
| CMF:0.75CaCO <sub>3</sub> | 62.667 | 0.440 | C |   |
| CMF:0.50CaCO <sub>3</sub> | 55.453 | 0.303 | D |   |
| CMF:0.25CaCO <sub>3</sub> | 45.078 | 0.408 | E |   |
| CMF                       | 27.918 | 0.286 |   | F |
| CaCO <sub>3</sub>         | 89.156 | 0.240 | A |   |
| CMF:1.00CaCO <sub>3</sub> | 74.196 | 0.376 | B |   |
| CMF:0.75CaCO <sub>3</sub> | 63.131 | 0.222 | C |   |
| CMF:0.50CaCO <sub>3</sub> | 56.201 | 0.308 | D |   |
| CMF:0.25CaCO <sub>3</sub> | 47.216 | 0.354 | E |   |
| CMF                       | 28.091 | 0.300 |   | F |

|                           |        |       |   |   |
|---------------------------|--------|-------|---|---|
| CaCO <sub>3</sub>         | 89.162 | 0.193 | A |   |
| CMF:1.00CaCO <sub>3</sub> | 74.956 | 0.528 | B |   |
| CMF:0.75CaCO <sub>3</sub> | 64.228 | 0.290 | C |   |
| CMF:0.50CaCO <sub>3</sub> | 57.270 | 0.316 | D |   |
| CMF:0.25CaCO <sub>3</sub> | 48.064 | 0.436 | E |   |
| CMF                       | 28.201 | 0.277 |   | F |
| CaCO <sub>3</sub>         | 89.162 | 0.222 | A |   |
| CMF:1.00CaCO <sub>3</sub> | 75.701 | 0.534 | B |   |
| CMF:0.75CaCO <sub>3</sub> | 64.926 | 0.396 | C |   |
| CMF:0.50CaCO <sub>3</sub> | 57.276 | 0.316 | D |   |
| CMF:0.25CaCO <sub>3</sub> | 48.218 | 0.338 | E |   |
| CMF                       | 28.273 | 0.302 |   | F |
| CaCO <sub>3</sub>         | 89.172 | 0.229 | A |   |
| CMF:1.00CaCO <sub>3</sub> | 75.705 | 0.534 | B |   |
| CMF:0.75CaCO <sub>3</sub> | 64.914 | 0.293 | C |   |
| CMF:0.50CaCO <sub>3</sub> | 57.281 | 0.316 | D |   |
| CMF:0.25CaCO <sub>3</sub> | 48.379 | 0.321 | E |   |
| CMF                       | 28.393 | 0.267 |   | F |

\*Means that do not share a letter are significantly different;  $p < 0.05$

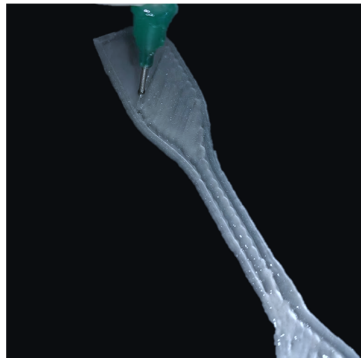

**Figure S1.** Printing of CMF tensile sample according to ASTM D638 Type IV.

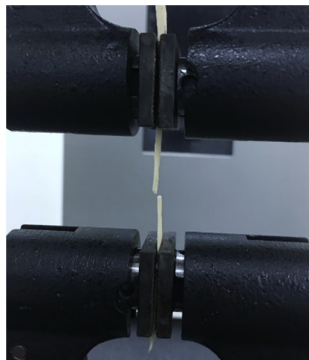

**Figure S2.** Tensile testing of regenerated and dried printed CMF tensile sample.

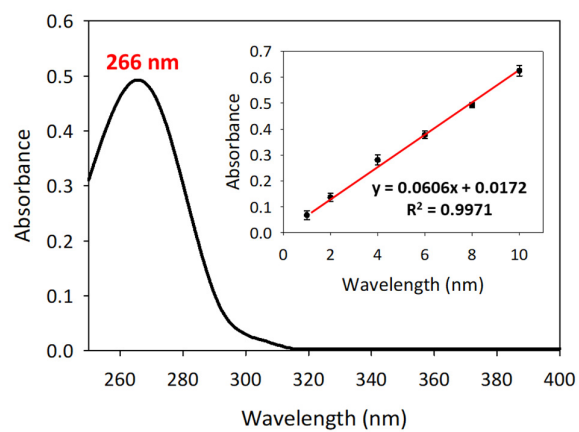

**Figure S3.** (a) UV Spectrum of 5-fluorouracil (5-FU) (inset shows linear calibration curve according to the Beer-Lambert law). The data are presented as mean  $\pm$  standard deviation ( $n = 3$ ).
